# Supplementary material
Source: MDPI journal article supplement (https://www.mdpi.com/1424-8247/16/4/549)
Supplement: s1 [file s1]

## Supplementary Information associated with the paper

### Contents

#### 1. NMR spectra of compounds 1–13.

|                                                                                        |    |
|----------------------------------------------------------------------------------------|----|
| <sup>1</sup> H NMR spectrum (a) and <sup>13</sup> C NMR (b) of compound 1 (IND-NHU).   | 3  |
| <sup>1</sup> H NMR spectrum (a) and <sup>13</sup> C NMR (b) of compound 2 (FLU-NHU).   | 4  |
| <sup>1</sup> H NMR spectrum (a) and <sup>13</sup> C NMR (b) of compound 3 (DIKLO-NHU). | 5  |
| <sup>1</sup> H NMR spectrum (a) and <sup>13</sup> C NMR (b) of compound 4 (BHTK-MHIS). | 6  |
| <sup>1</sup> H NMR spectrum (a) and <sup>13</sup> C NMR (b) of compound 5 (BHTK-MGLY). | 7  |
| <sup>1</sup> H NMR spectrum (a) and <sup>13</sup> C NMR (b) of compound 6 (BHTK-AA).   | 8  |
| <sup>1</sup> H NMR spectrum (a) and <sup>13</sup> C NMR (b) of compound 7 (BHTK-PA).   | 9  |
| <sup>1</sup> H NMR spectrum (a) and <sup>13</sup> C NMR (b) of compound 8 (2A).        | 10 |
| <sup>1</sup> H NMR spectrum (a) and <sup>13</sup> C NMR (b) of compound 9 (2D).        | 11 |
| <sup>1</sup> H NMR spectrum (a) and <sup>13</sup> C NMR (b) of compound 10 (QSAR17).   | 12 |
| <sup>1</sup> H NMR spectrum (a) and <sup>13</sup> C NMR (b) of compound 11 (IBU-Ac).   | 13 |
| <sup>1</sup> H NMR spectrum (a) and <sup>13</sup> C NMR (b) of compound 12 (NAP-Ac).   | 14 |
| <sup>1</sup> H NMR spectrum (a) and <sup>13</sup> C NMR (b) of compound 13 (BHTA-3AR). | 15 |

|                                                                                    |       |
|------------------------------------------------------------------------------------|-------|
| 2. Statistically significant differences (Wilcoxon test) between tested compounds. | 16-17 |
|------------------------------------------------------------------------------------|-------|

(a)

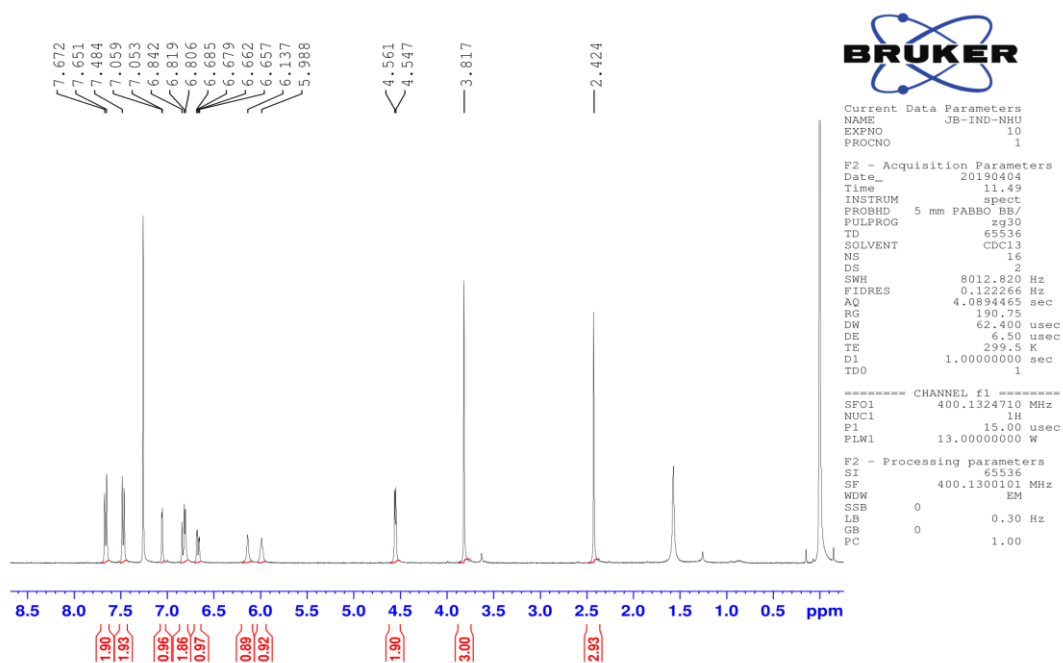

(b)

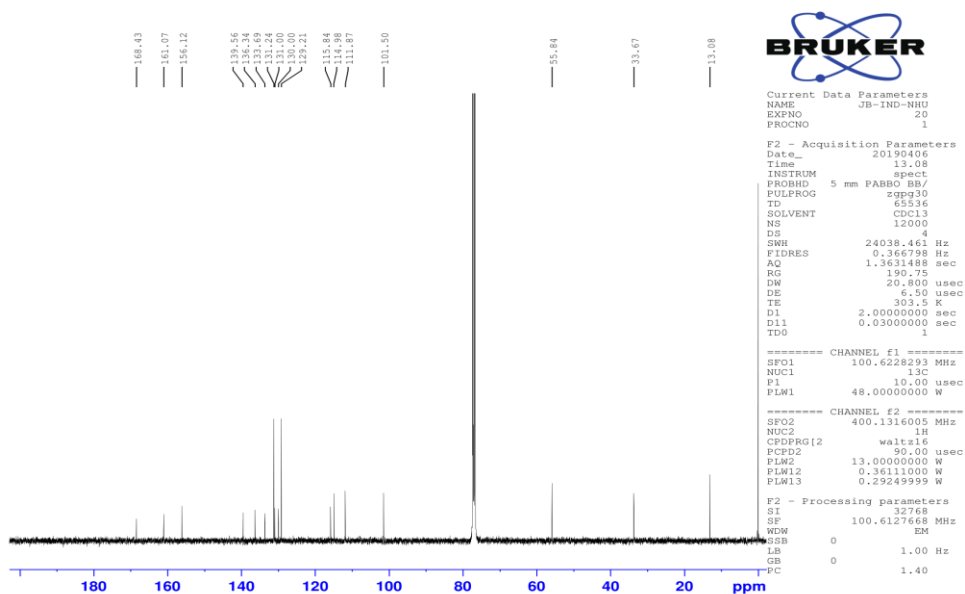

Figure S1.  $^1\text{H}$  NMR spectrum (a) and  $^{13}\text{C}$  NMR (b) of compound 1 (IND-NHU).

(a)

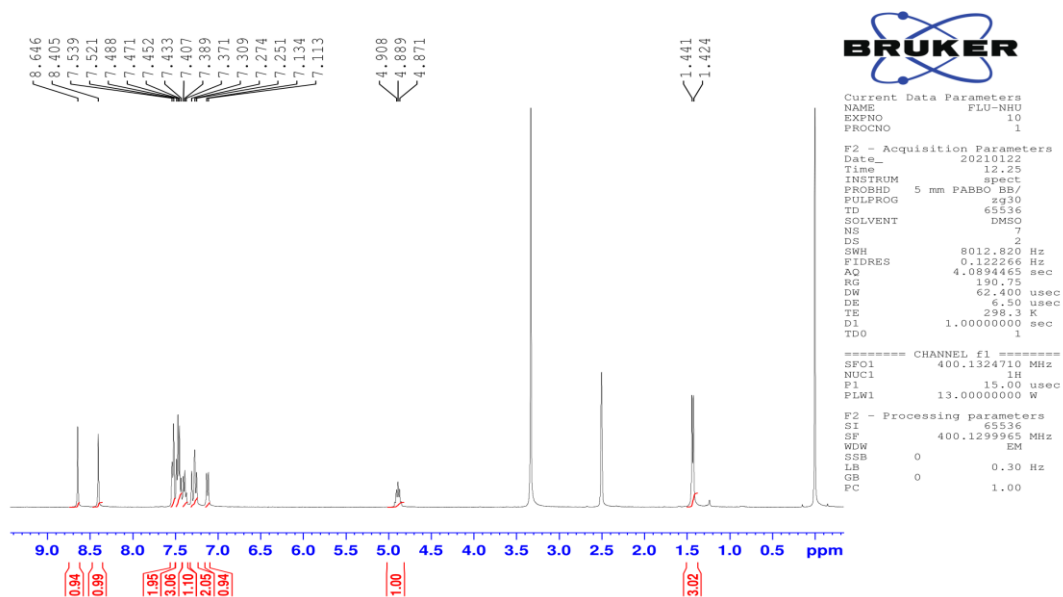

(b)

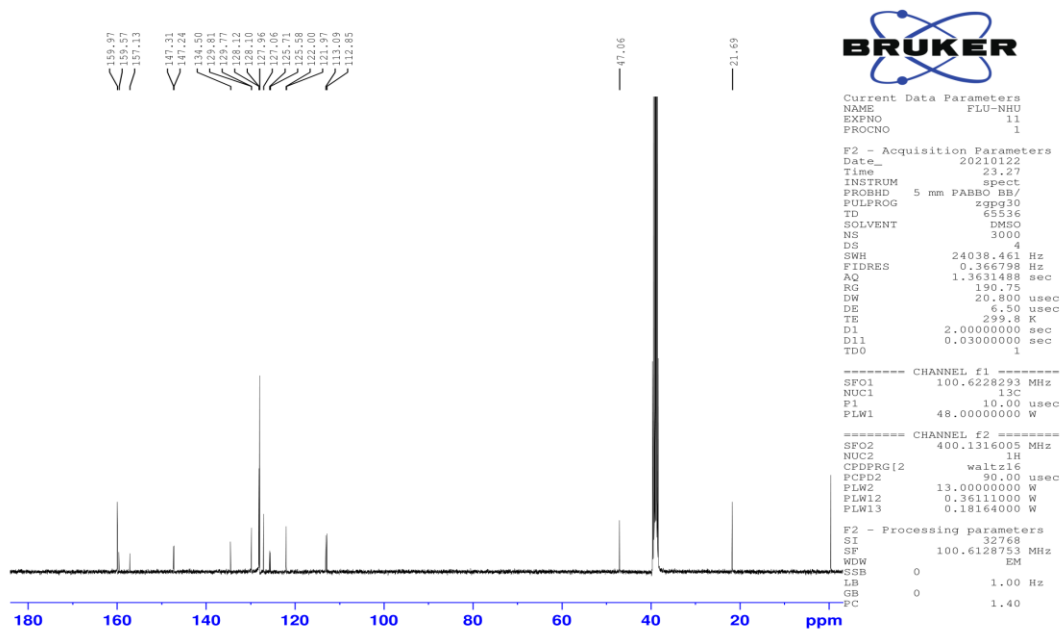

Figure S2.  $^1\text{H}$  NMR spectrum (a) and  $^{13}\text{C}$  NMR (b) of compound 2 (FLU-NHU).

(a)

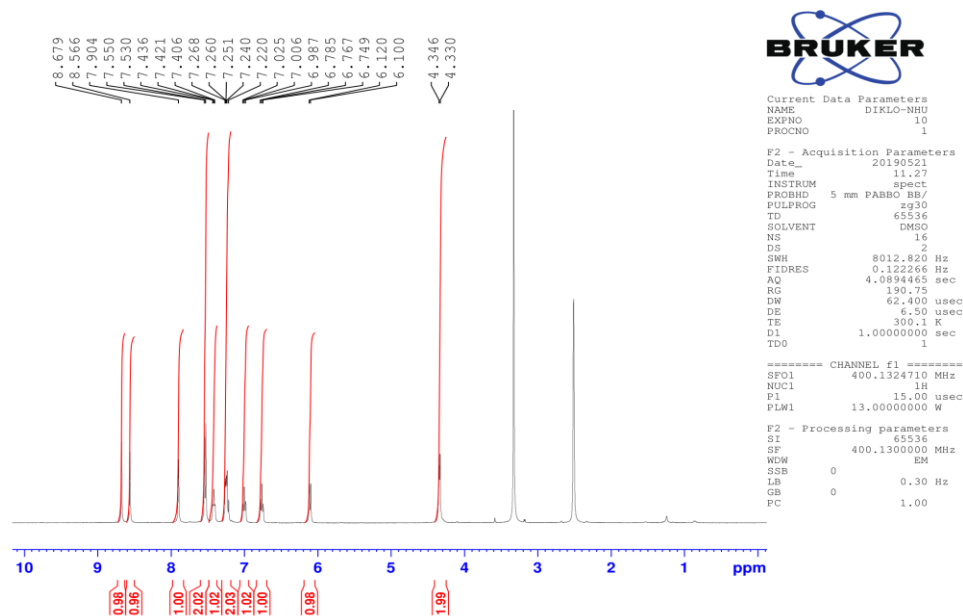

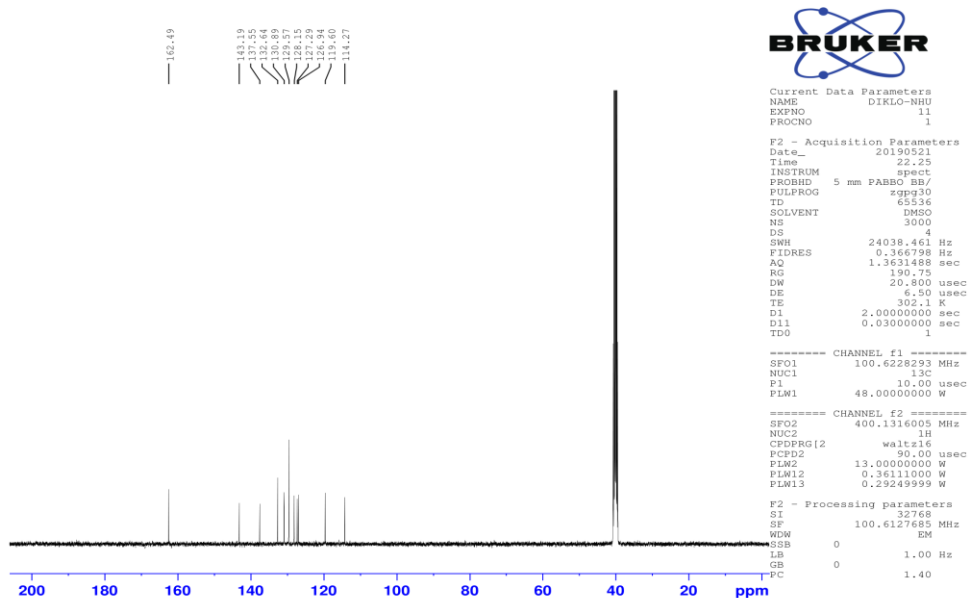

(b)

Figure S3.  $^1\text{H}$  NMR spectrum (a) and  $^{13}\text{C}$  NMR (b) of compound 3 (DIKLO-NHU).

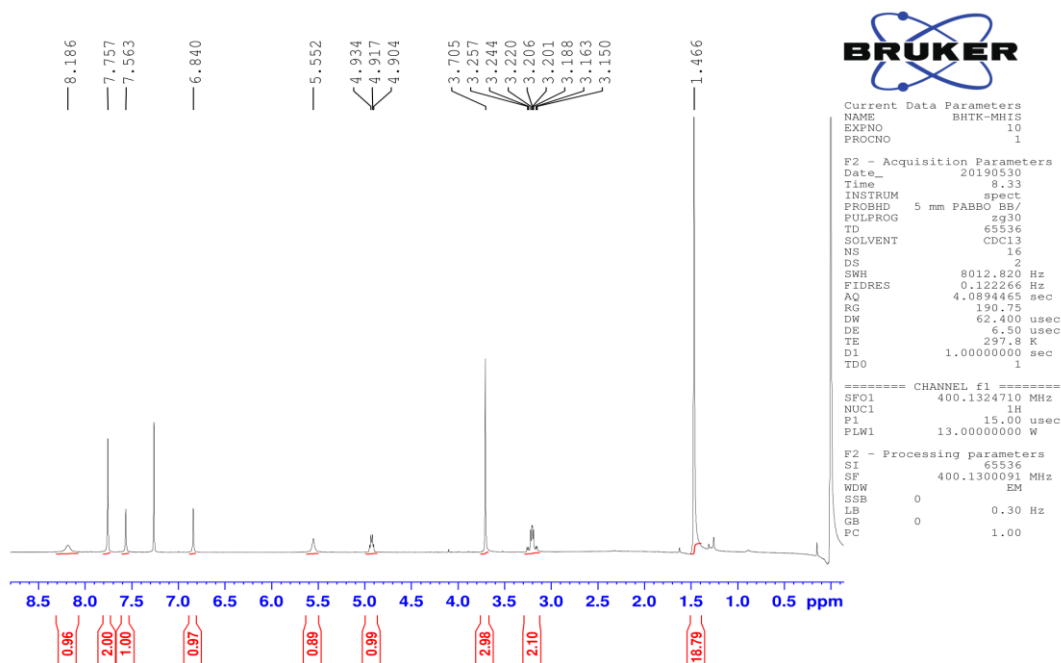

(a)

(b)

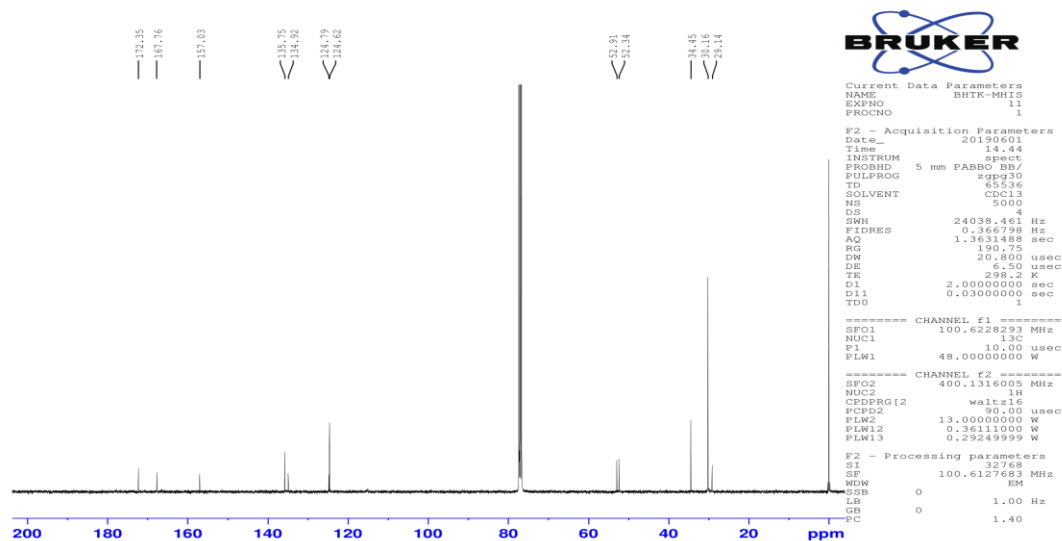

Figure S4.  $^1\text{H}$  NMR spectrum (a) and  $^{13}\text{C}$  NMR (b) of compound 4 (BHTK-MHIS).

(a)

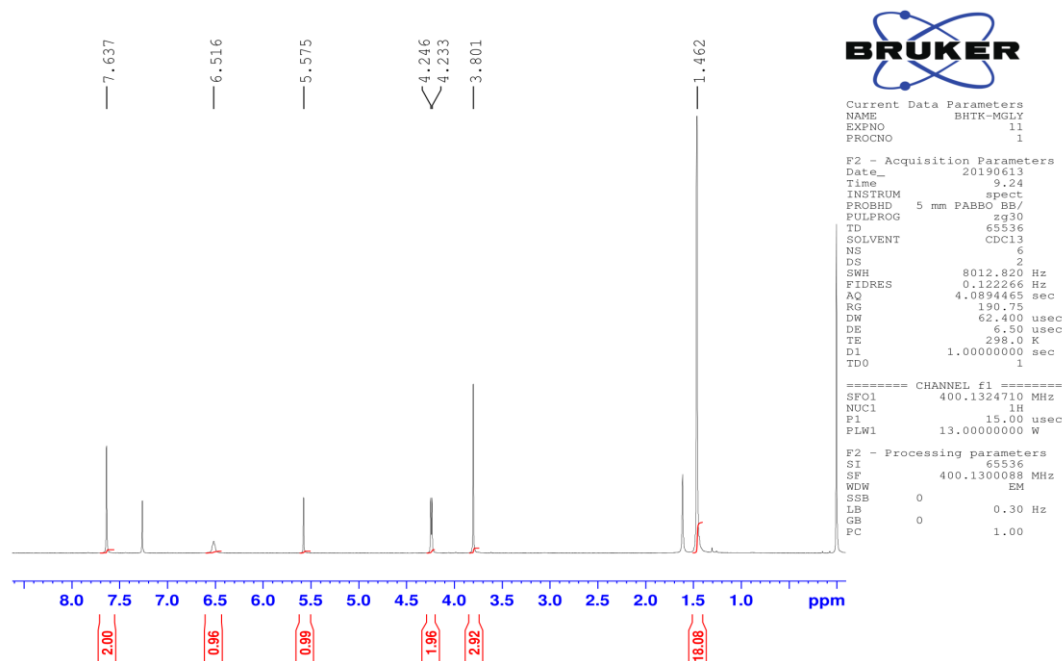

(b)

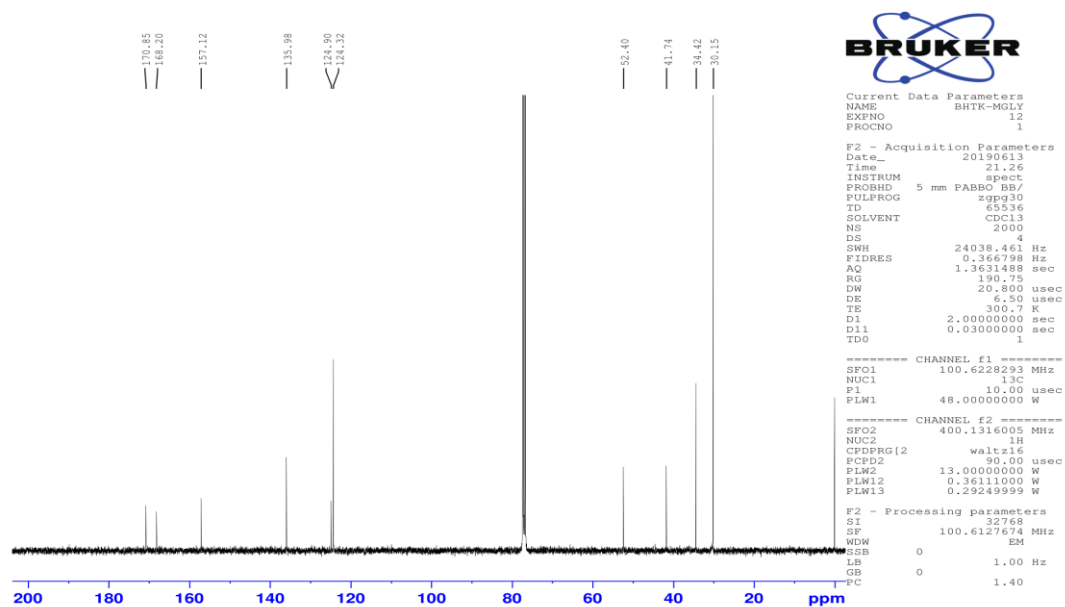

Figure S5. <sup>1</sup>H NMR spectrum (a) and <sup>13</sup>C NMR (b) of compound 5 (BHTK-MGLY).

(a)

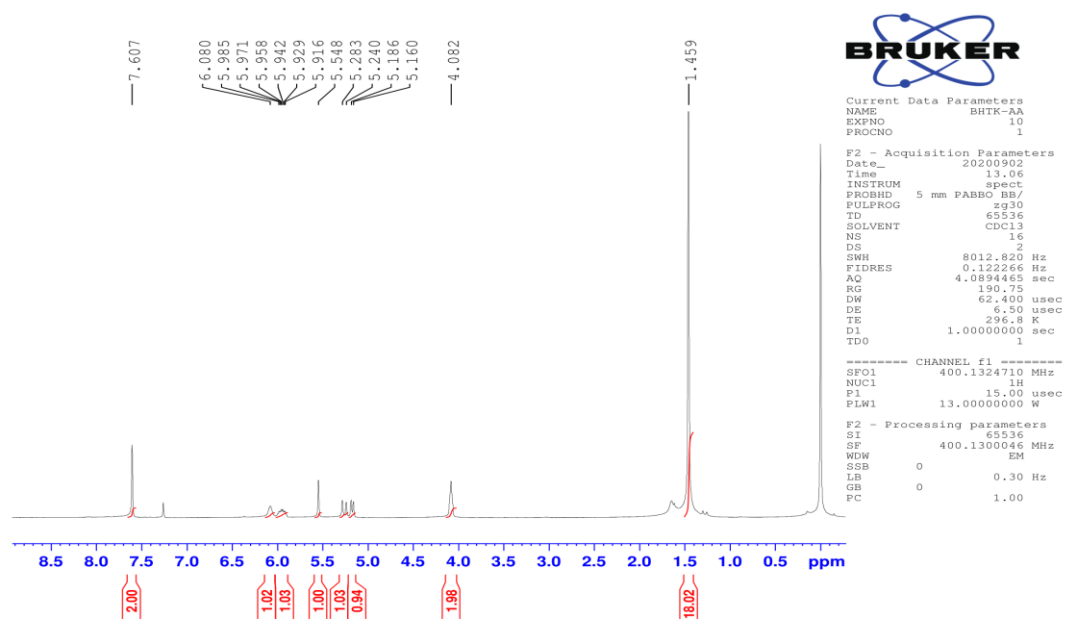

(b)

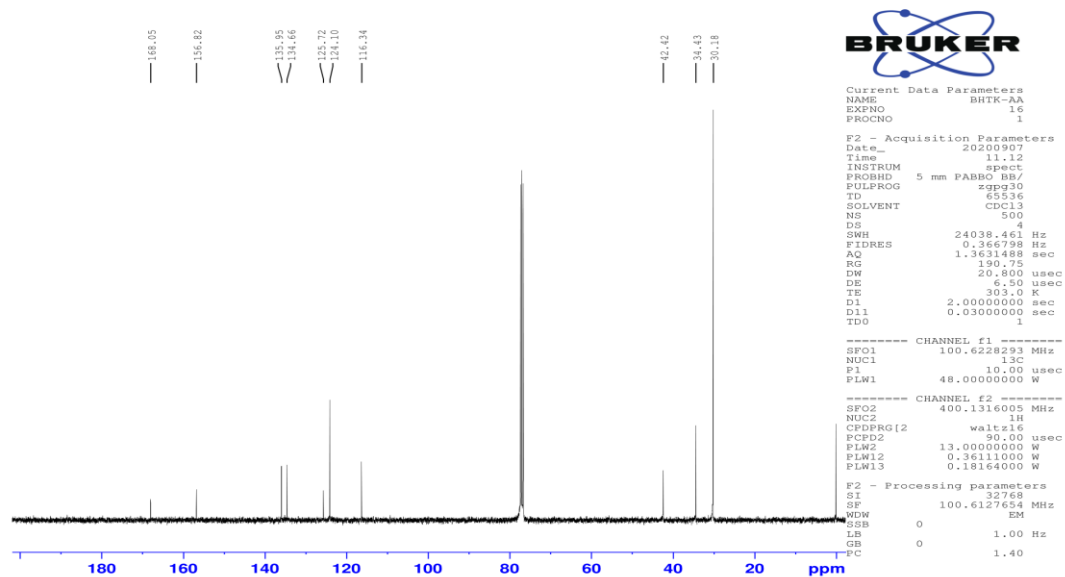

Figure S6. <sup>1</sup>H NMR spectrum (a) and <sup>13</sup>C NMR (b) of compound 6 (BHTK-AA).

(a)

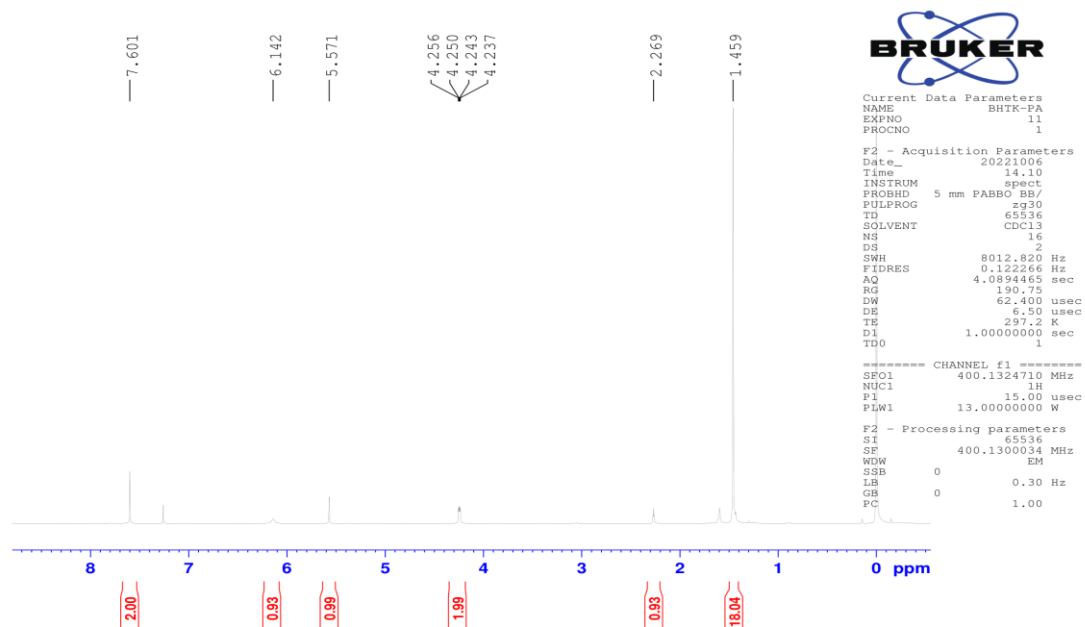



(b)

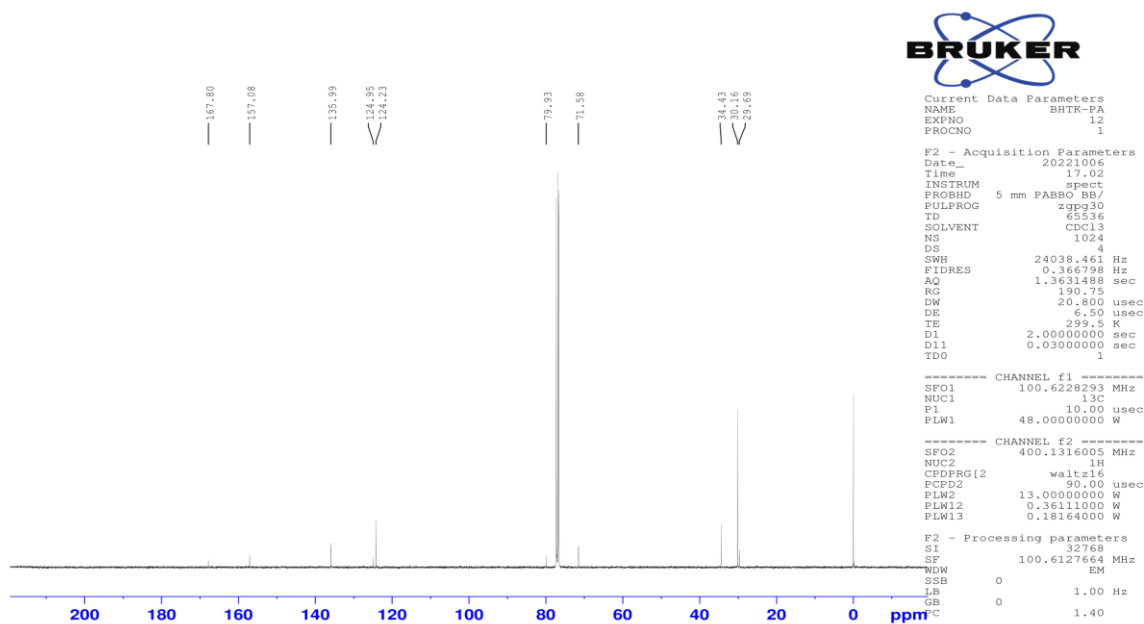

Figure S7.  $^1\text{H}$  NMR spectrum (a) and  $^{13}\text{C}$  NMR (b) of compound 7 (BHTK-PA).

(a)

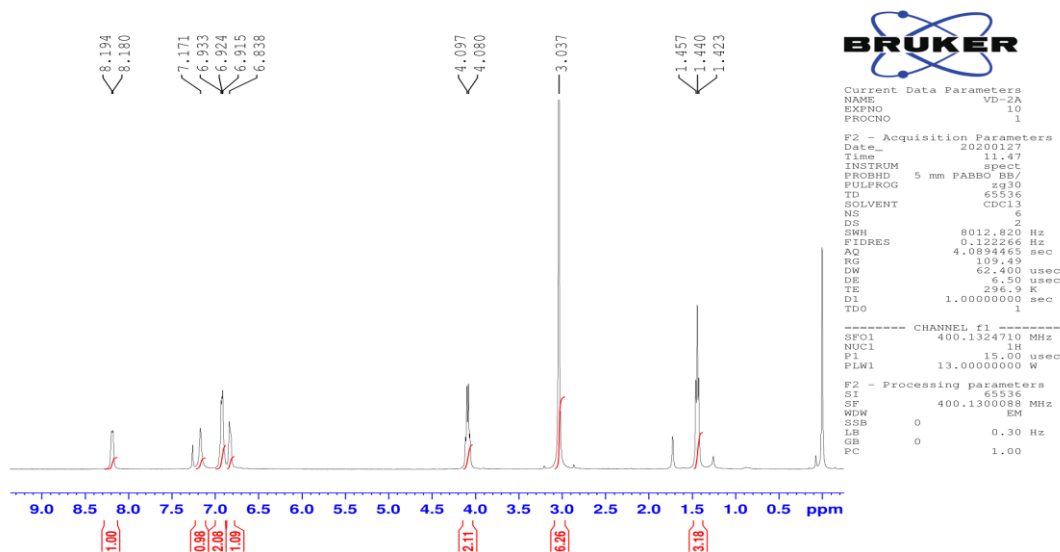

(b)

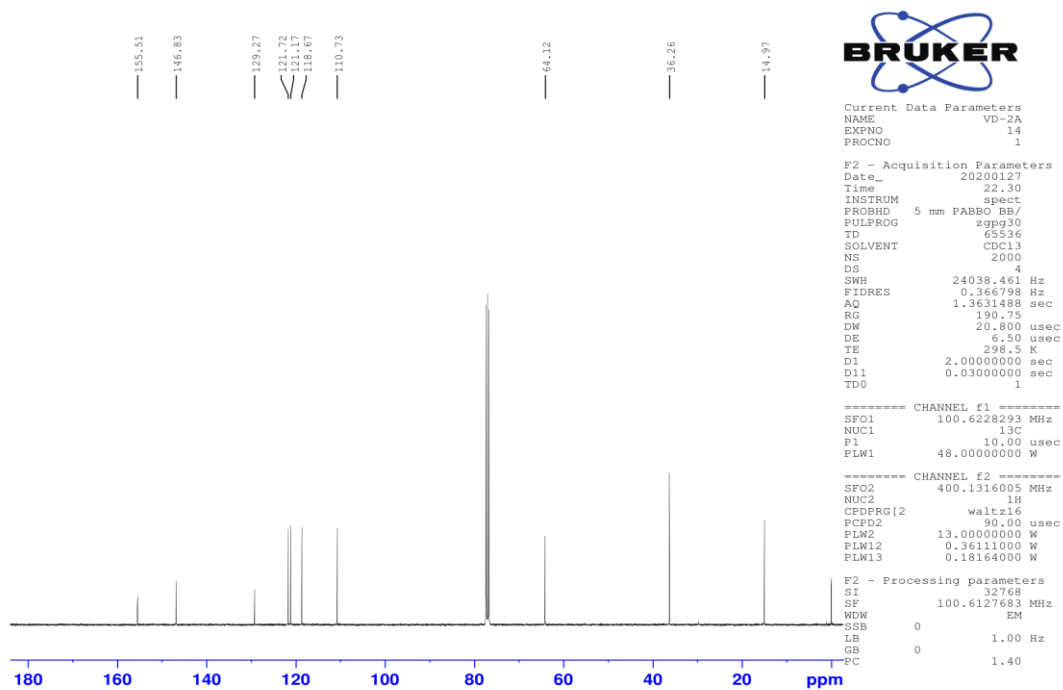

Figure S8.  $^1\text{H}$  NMR spectrum (a) and  $^{13}\text{C}$  NMR (b) of compound 8 (2A).

(a)

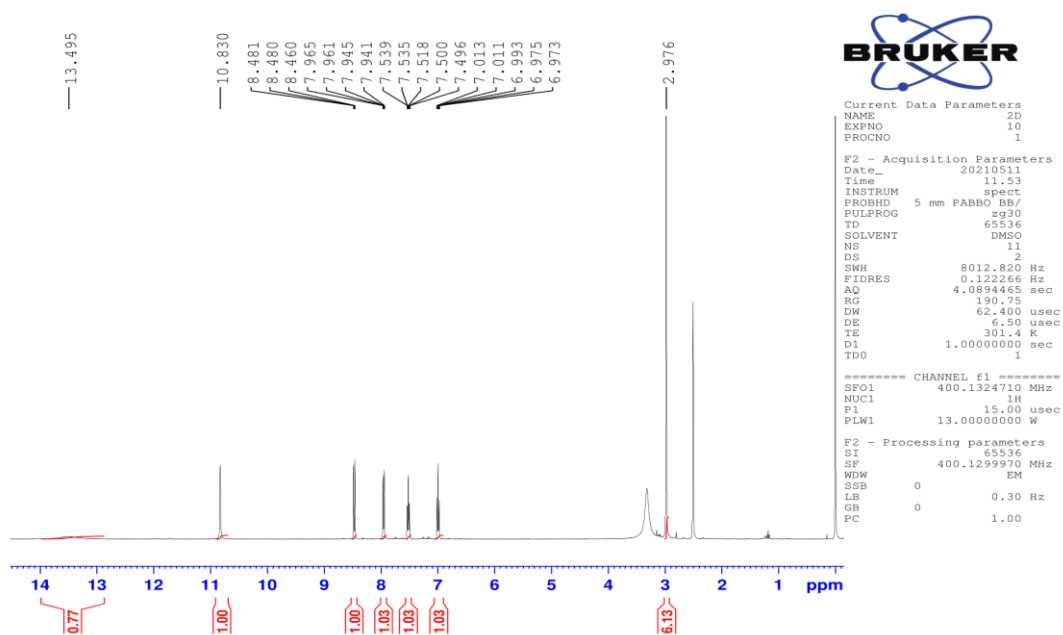

(b)

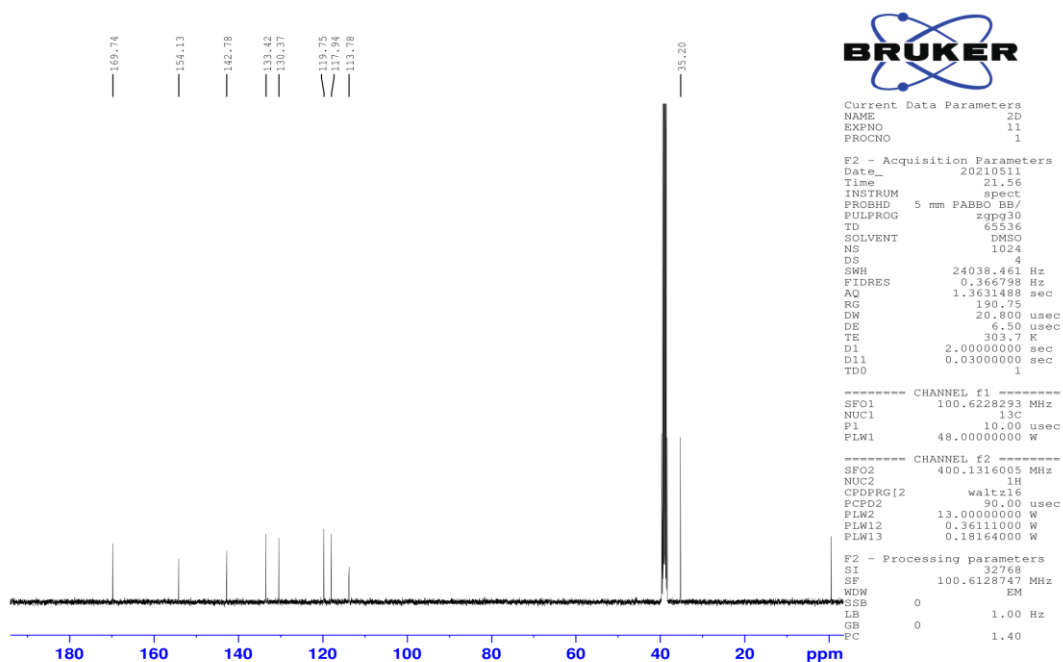

Figure S9.  $^1\text{H}$  NMR spectrum (a) and  $^{13}\text{C}$  NMR (b) of compound **9** (2D).

(a)

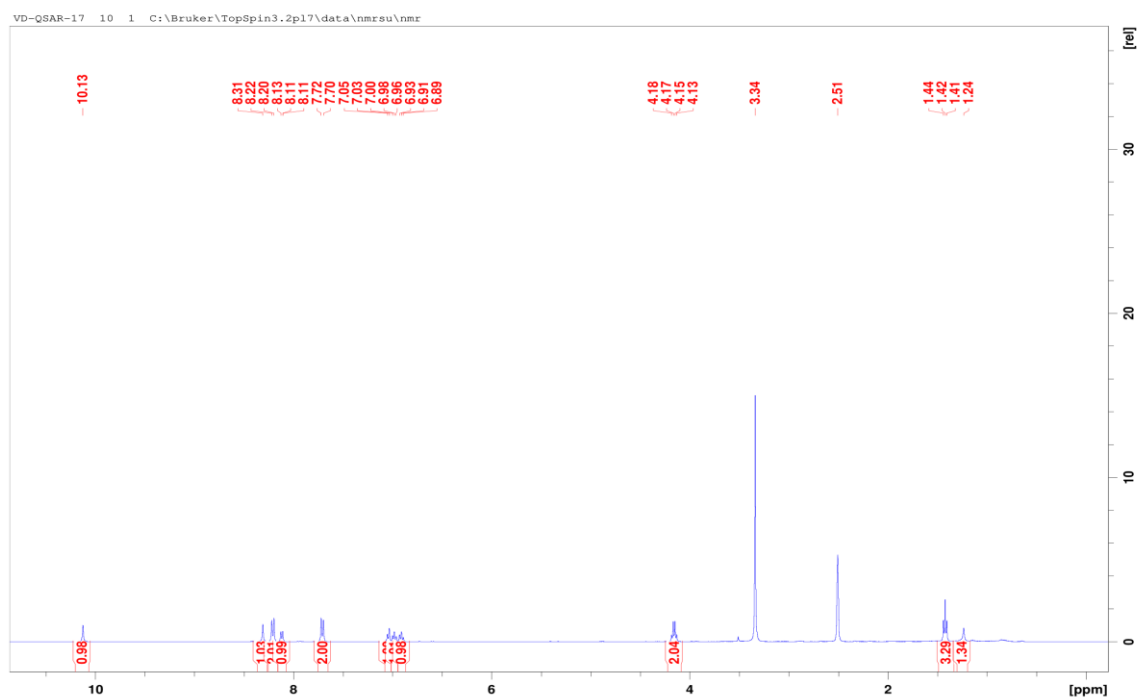

(b)

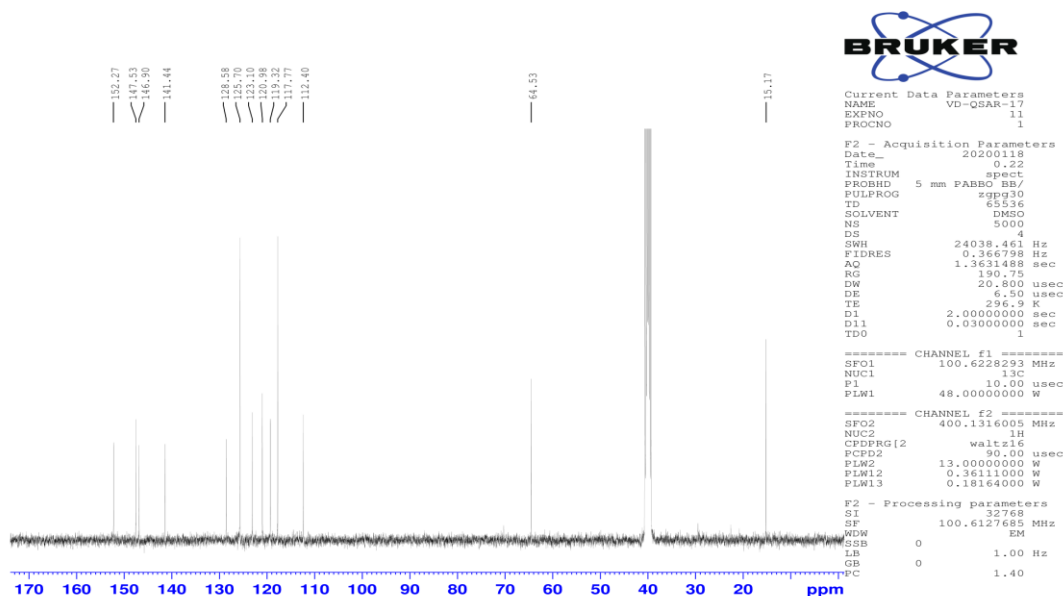

Figure S10.  $^1\text{H}$  NMR spectrum (a) and  $^{13}\text{C}$  NMR (b) of compound 10 (QSAR17).

(a)

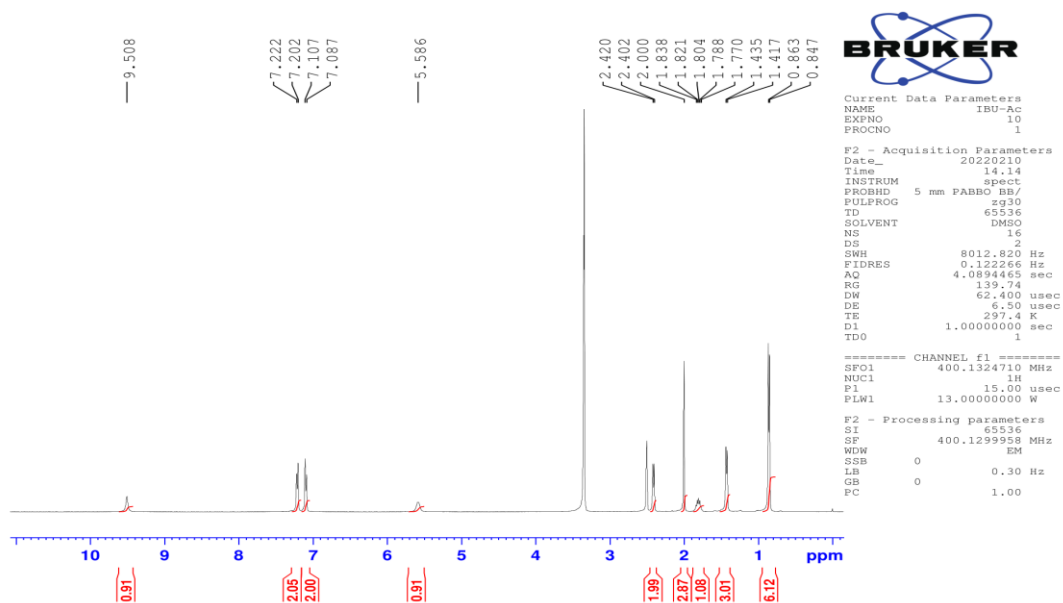

(b)

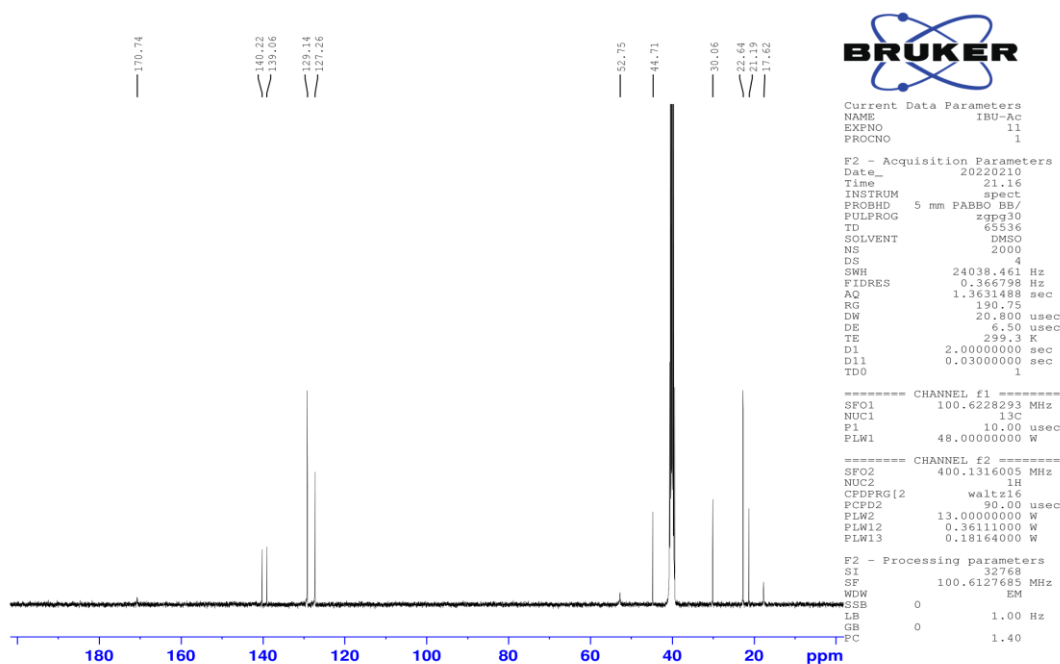

Figure S11.  $^1\text{H}$  NMR spectrum (a) and  $^{13}\text{C}$  NMR (b) of compound 11 (IBU-Ac).

(a)

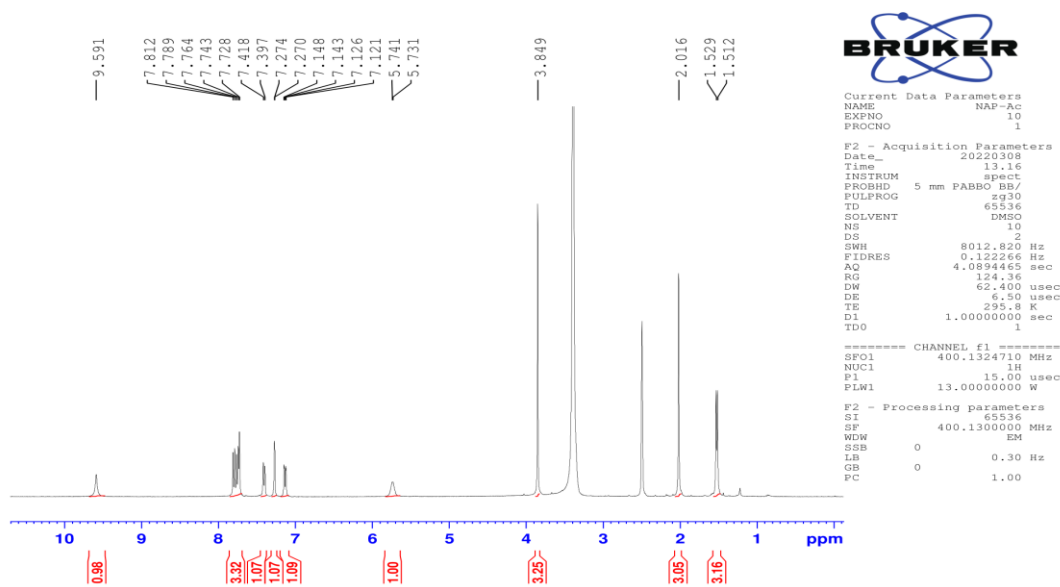

(b)

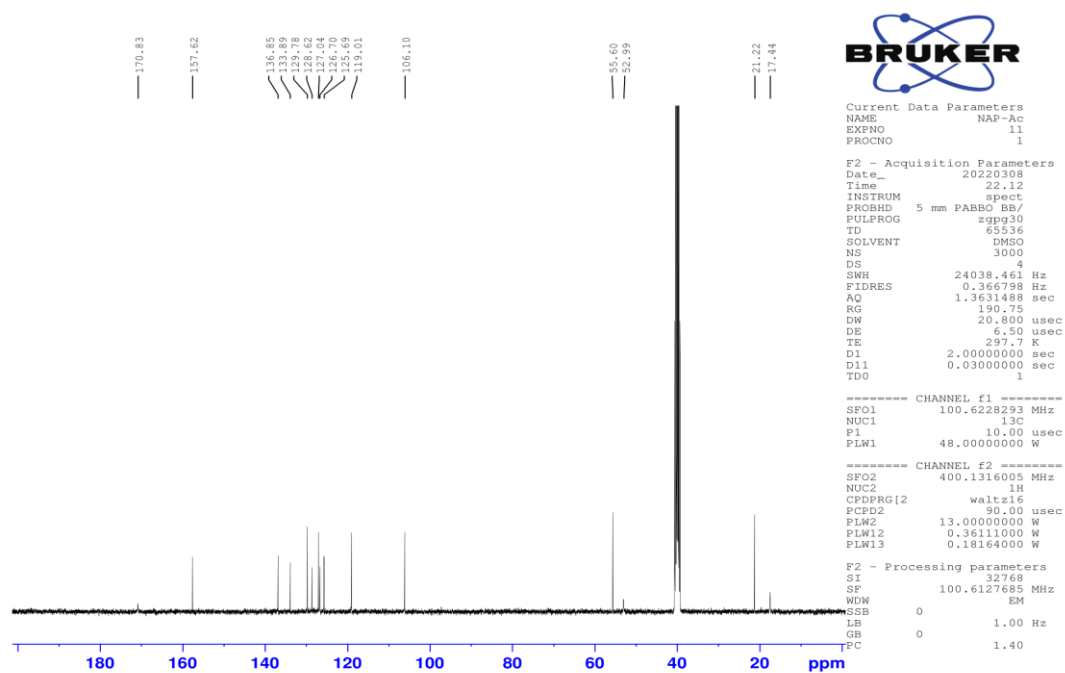

Figure S12. <sup>1</sup>H NMR spectrum (a) and <sup>13</sup>C NMR (b) of compound 12 (NAP-Ac).

(a)

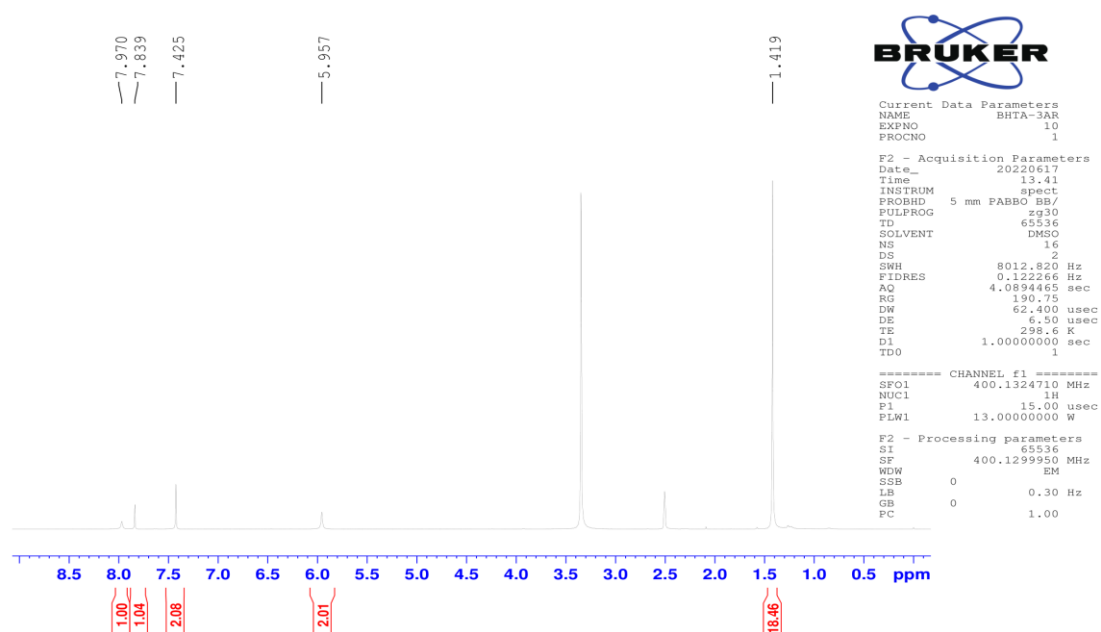

(b)

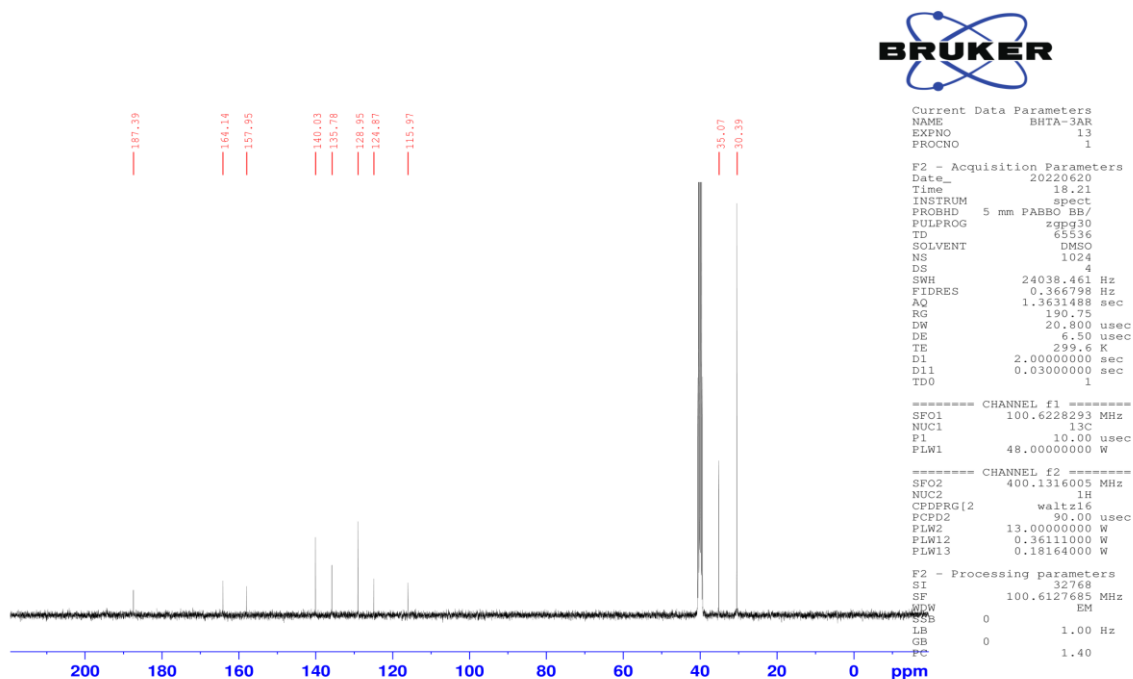

**Figure S13.**  $^1\text{H}$  NMR spectrum (a) and  $^{13}\text{C}$  NMR (b) of compound **13** (BHTA-3AR).

**Tables S1–S4.** Statistically significant differences (Wilcoxon test) between tested compounds.

**Table S1**

|           | 2 h incubation |       |    |       |       |       |    |    |       |       |       |       |       |     |           |          |      |        |       |
|-----------|----------------|-------|----|-------|-------|-------|----|----|-------|-------|-------|-------|-------|-----|-----------|----------|------|--------|-------|
|           | 1              | 2     | 3  | 4     | 5     | 6     | 7  | 8  | 9     | 10    | 11    | 12    | 13    | BHT | Celecoxib | Zileuton | Urea | Trolox | TBH   |
| 1         | /              | ns    | ns | ns    | ns    | ns    | ns | ns | ns    | ns    | ns    | ns    | ns    | ns  | ns        | ns       | ns   | ns     | ns    |
| 2         | ns             | /     | ns | ns    | ns    | ns    | ns | ns | ns    | 0.022 | 0.017 | ns    | ns    | ns  | ns        | ns       | ns   | ns     | ns    |
| 3         | ns             | ns    | /  | ns    | ns    | ns    | ns | ns | ns    | ns    | ns    | ns    | ns    | ns  | ns        | ns       | ns   | ns     | ns    |
| 4         | ns             | ns    | ns | /     | ns    | ns    | ns | ns | ns    | 0.047 | ns    | ns    | ns    | ns  | ns        | ns       | ns   | ns     | 0.005 |
| 5         | ns             | ns    | ns | ns    | /     | ns    | ns | ns | ns    | ns    | ns    | ns    | ns    | ns  | ns        | ns       | ns   | ns     | 0.005 |
| 6         | ns             | ns    | ns | ns    | ns    | /     | ns | ns | ns    | 0.012 | ns    | ns    | ns    | ns  | ns        | ns       | ns   | ns     | ns    |
| 7         | ns             | ns    | ns | ns    | ns    | ns    | /  | ns | ns    | ns    | ns    | ns    | ns    | ns  | ns        | ns       | ns   | ns     | ns    |
| 8         | ns             | ns    | ns | ns    | ns    | ns    | ns | /  | ns    | ns    | ns    | ns    | ns    | ns  | ns        | ns       | ns   | ns     | ns    |
| 9         | ns             | ns    | ns | ns    | ns    | ns    | ns | ns | /     | ns    | ns    | ns    | ns    | ns  | ns        | ns       | ns   | ns     | 0.017 |
| 10        | ns             | 0.022 | ns | 0.047 | ns    | 0.012 | ns | ns | ns    | /     | ns    | ns    | 0.007 | ns  | ns        | ns       | ns   | ns     | 0.005 |
| 11        | ns             | 0.017 | ns | ns    | ns    | ns    | ns | ns | ns    | ns    | /     | ns    | ns    | ns  | ns        | ns       | ns   | ns     | 0.005 |
| 12        | ns             | ns    | ns | ns    | ns    | ns    | ns | ns | ns    | ns    | ns    | /     | 0.005 | ns  | ns        | ns       | ns   | ns     | ns    |
| 13        | ns             | ns    | ns | ns    | ns    | ns    | ns | ns | ns    | 0.007 | ns    | 0.005 | /     | ns  | ns        | ns       | ns   | ns     | 0.005 |
| BHT       | ns             | ns    | ns | ns    | ns    | ns    | ns | ns | ns    | ns    | ns    | ns    | ns    | /   | ns        | ns       | ns   | ns     | ns    |
| Celecoxib | ns             | ns    | ns | ns    | ns    | ns    | ns | ns | ns    | ns    | ns    | ns    | ns    | ns  | /         | ns       | ns   | ns     | ns    |
| Zileuton  | ns             | ns    | ns | ns    | ns    | ns    | ns | ns | ns    | ns    | ns    | ns    | ns    | ns  | ns        | /        | ns   | ns     | ns    |
| Urea      | ns             | ns    | ns | ns    | ns    | ns    | ns | ns | ns    | ns    | ns    | ns    | ns    | ns  | ns        | ns       | /    | ns     | ns    |
| Trolox    | ns             | ns    | ns | ns    | ns    | ns    | ns | ns | ns    | ns    | ns    | ns    | ns    | ns  | ns        | ns       | ns   | /      | 0.006 |
| TBH       | ns             | ns    | ns | 0.005 | 0.005 | ns    | ns | ns | 0.017 | 0.005 | 0.005 | ns    | 0.005 | ns  | ns        | ns       | ns   | 0.006  | /     |

**Table S2**

|           | 24 h incubation |       |       |       |       |       |    |       |       |       |       |       |       |     |           |          |      |        |       |
|-----------|-----------------|-------|-------|-------|-------|-------|----|-------|-------|-------|-------|-------|-------|-----|-----------|----------|------|--------|-------|
|           | 1               | 2     | 3     | 4     | 5     | 6     | 7  | 8     | 9     | 10    | 11    | 12    | 13    | BHT | Celecoxib | Zileuton | Urea | Trolox | TBH   |
| 1         | /               | ns    | ns    | 0.005 | 0.012 | 0.005 | ns | ns    | ns    | ns    | 0.007 | 0.005 | ns    | ns  | ns        | ns       | ns   | 0.005  | 0.005 |
| 2         | ns              | /     | ns    | 0.005 | 0.009 | 0.005 | ns | ns    | ns    | ns    | 0.007 | 0.005 | ns    | ns  | ns        | ns       | ns   | 0.047  | 0.005 |
| 3         | ns              | ns    | /     | 0.005 | ns    | 0.005 | ns | ns    | ns    | ns    | 0.009 | ns    | ns    | ns  | ns        | ns       | ns   | 0.028  | 0.005 |
| 4         | 0.005           | 0.005 | 0.005 | /     | ns    | ns    | ns | ns    | 0.022 | ns    | 0.022 | ns    | 0.005 | ns  | ns        | ns       | ns   | 0.005  | ns    |
| 5         | 0.012           | 0.009 | ns    | ns    | /     | ns    | ns | ns    | ns    | ns    | ns    | ns    | 0.007 | ns  | ns        | ns       | ns   | 0.005  | 0.007 |
| 6         | 0.005           | 0.005 | 0.005 | ns    | ns    | /     | ns | ns    | ns    | ns    | 0.009 | ns    | 0.005 | ns  | ns        | ns       | ns   | 0.005  | ns    |
| 7         | ns              | ns    | ns    | ns    | ns    | ns    | /  | ns    | ns    | ns    | ns    | ns    | ns    | ns  | ns        | ns       | ns   | ns     | ns    |
| 8         | ns              | ns    | ns    | ns    | ns    | ns    | ns | /     | ns    | ns    | ns    | ns    | ns    | ns  | ns        | ns       | ns   | ns     | 0.005 |
| 9         | ns              | ns    | ns    | 0.022 | ns    | ns    | ns | ns    | /     | ns    | ns    | ns    | ns    | ns  | ns        | ns       | ns   | ns     | 0.022 |
| 10        | ns              | ns    | ns    | ns    | ns    | ns    | ns | ns    | ns    | /     | ns    | ns    | ns    | ns  | ns        | ns       | ns   | ns     | ns    |
| 11        | 0.007           | 0.007 | ns    | 0.022 | ns    | 0.009 | ns | ns    | ns    | ns    | /     | 0.022 | 0.007 | ns  | ns        | ns       | ns   | 0.005  | 0.012 |
| 12        | 0.005           | 0.005 | 0.009 | ns    | ns    | ns    | ns | ns    | ns    | 0.022 | /     | 0.005 | ns    | ns  | ns        | ns       | ns   | 0.005  | 0.012 |
| 13        | ns              | ns    | ns    | 0.005 | 0.007 | 0.005 | ns | ns    | ns    | ns    | 0.007 | 0.005 | /     | ns  | ns        | ns       | ns   | ns     | 0.005 |
| BHT       | ns              | ns    | ns    | ns    | ns    | ns    | ns | ns    | ns    | ns    | ns    | ns    | ns    | /   | ns        | ns       | ns   | ns     | ns    |
| Celecoxib | ns              | ns    | ns    | ns    | ns    | ns    | ns | ns    | ns    | ns    | ns    | ns    | ns    | ns  | /         | ns       | ns   | ns     | ns    |
| Zileuton  | ns              | ns    | ns    | ns    | ns    | ns    | ns | ns    | ns    | ns    | ns    | ns    | ns    | ns  | ns        | /        | ns   | ns     | ns    |
| Urea      | ns              | ns    | ns    | ns    | ns    | ns    | ns | ns    | ns    | ns    | ns    | ns    | ns    | ns  | ns        | ns       | /    | ns     | ns    |
| Trolox    | 0.005           | 0.047 | 0.028 | 0.005 | 0.005 | 0.005 | ns | ns    | ns    | ns    | 0.005 | 0.005 | ns    | ns  | ns        | ns       | ns   | /      | 0.000 |
| TBH       | 0.005           | 0.005 | 0.005 | ns    | 0.007 | ns    | ns | 0.005 | 0.022 | ns    | 0.012 | 0.012 | 0.005 | ns  | ns        | ns       | ns   | 0.000  | /     |



Table S3

|           | 2 h incubation, TBH added |       |       |       |       |       |    |       |       |       |       |       |       |     |           |          |      |        |       |
|-----------|---------------------------|-------|-------|-------|-------|-------|----|-------|-------|-------|-------|-------|-------|-----|-----------|----------|------|--------|-------|
|           | 1                         | 2     | 3     | 4     | 5     | 6     | 7  | 8     | 9     | 10    | 11    | 12    | 13    | BHT | Celecoxib | Zileuton | Urea | Trolox | TBH   |
| 1         | /                         | 0.012 | ns    | ns    | ns    | ns    | ns | ns    | ns    | ns    | ns    | 0.022 | ns    | ns  | ns        | ns       | ns   | 0.009  | ns    |
| 2         | 0.012                     | /     | ns    | ns    | ns    | ns    | ns | 0.007 | 0.028 | 0.012 | ns    | ns    | 0.022 | ns  | ns        | ns       | ns   | ns     | 0.050 |
| 3         | ns                        | ns    | ns    | ns    | ns    | ns    | ns | 0.028 | ns    | ns    | ns    | ns    | ns    | ns  | ns        | ns       | ns   | 0.028  | ns    |
| 4         | ns                        | ns    | ns    | /     | 0.007 | ns    | ns | ns    | ns    | ns    | ns    | ns    | ns    | ns  | ns        | ns       | ns   | 0.005  | ns    |
| 5         | ns                        | ns    | ns    | 0.007 | /     | ns    | ns | 0.047 | ns    | 0.037 | ns    | ns    | ns    | ns  | ns        | ns       | ns   | ns     | ns    |
| 6         | ns                        | ns    | ns    | ns    | ns    | /     | ns | ns    | ns    | 0.047 | ns    | ns    | ns    | ns  | ns        | ns       | ns   | ns     | ns    |
| 7         | ns                        | ns    | ns    | ns    | ns    | ns    | /  | ns    | ns    | ns    | ns    | ns    | ns    | ns  | ns        | ns       | ns   | ns     | ns    |
| 8         | ns                        | 0.007 | 0.028 | ns    | 0.047 | ns    | ns | /     | ns    | ns    | 0.017 | 0.007 | 0.028 | ns  | ns        | ns       | ns   | 0.022  | ns    |
| 9         | ns                        | 0.028 | ns    | ns    | ns    | ns    | ns | /     | ns    | ns    | 0.047 | ns    | ns    | ns  | ns        | ns       | ns   | 0.037  | ns    |
| 10        | ns                        | 0.012 | ns    | ns    | 0.037 | 0.047 | ns | ns    | ns    | /     | ns    | 0.007 | ns    | ns  | ns        | ns       | ns   | 0.028  | ns    |
| 11        | ns                        | ns    | ns    | ns    | ns    | ns    | ns | 0.017 | ns    | ns    | /     | ns    | ns    | ns  | ns        | ns       | ns   | 0.037  | ns    |
| 12        | 0.022                     | ns    | ns    | ns    | ns    | ns    | ns | 0.007 | 0.047 | 0.007 | ns    | /     | 0.009 | ns  | ns        | ns       | ns   | ns     | 0.028 |
| 13        | ns                        | 0.022 | ns    | ns    | ns    | ns    | ns | 0.028 | ns    | ns    | ns    | 0.009 | /     | ns  | ns        | ns       | ns   | ns     | ns    |
| BHT       | ns                        | ns    | ns    | ns    | ns    | ns    | ns | ns    | ns    | ns    | ns    | ns    | ns    | /   | ns        | ns       | ns   | ns     | ns    |
| Celecoxib | ns                        | ns    | ns    | ns    | ns    | ns    | ns | ns    | ns    | ns    | ns    | ns    | ns    | ns  | /         | ns       | ns   | ns     | ns    |
| Zileuton  | ns                        | ns    | ns    | ns    | ns    | ns    | ns | ns    | ns    | ns    | ns    | ns    | ns    | ns  | ns        | /        | ns   | ns     | ns    |
| Urea      | ns                        | ns    | ns    | ns    | ns    | ns    | ns | ns    | ns    | ns    | ns    | ns    | ns    | ns  | ns        | ns       | /    | ns     | ns    |
| Trolox    | 0.009                     | ns    | 0.028 | 0.005 | ns    | ns    | ns | 0.022 | 0.037 | 0.028 | 0.037 | ns    | ns    | ns  | ns        | ns       | ns   | /      | 0.006 |
| TBH       | ns                        | 0.050 | ns    | ns    | ns    | ns    | ns | ns    | ns    | ns    | ns    | 0.028 | ns    | ns  | ns        | ns       | ns   | 0.006  | /     |

Table S4

|           | 24 h incubation, TBH added |       |       |       |       |       |    |       |       |       |       |       |       |     |           |          |      |        |       |
|-----------|----------------------------|-------|-------|-------|-------|-------|----|-------|-------|-------|-------|-------|-------|-----|-----------|----------|------|--------|-------|
|           | 1                          | 2     | 3     | 4     | 5     | 6     | 7  | 8     | 9     | 10    | 11    | 12    | 13    | BHT | Celecoxib | Zileuton | Urea | Trolox | TBH   |
| 1         | /                          | ns    | ns    | ns    | ns    | ns    | ns | 0.005 | ns    | ns    | 0.005 | ns    | ns    | ns  | ns        | ns       | ns   | 0.005  | ns    |
| 2         | ns                         | /     | 0.022 | ns    | ns    | ns    | ns | 0.007 | ns    | ns    | 0.012 | ns    | ns    | ns  | ns        | ns       | ns   | 0.005  | ns    |
| 3         | ns                         | 0.022 | /     | 0.005 | 0.017 | 0.022 | ns | ns    | ns    | ns    | ns    | 0.037 | ns    | ns  | ns        | ns       | ns   | 0.005  | 0.037 |
| 4         | ns                         | ns    | 0.005 | /     | 0.047 | ns    | ns | 0.007 | ns    | ns    | 0.005 | ns    | 0.028 | ns  | ns        | ns       | ns   | 0.005  | ns    |
| 5         | ns                         | ns    | 0.017 | 0.047 | /     | ns    | ns | 0.005 | ns    | ns    | 0.005 | ns    | ns    | ns  | ns        | ns       | ns   | 0.005  | ns    |
| 6         | ns                         | ns    | 0.022 | ns    | ns    | /     | ns | 0.005 | ns    | ns    | 0.005 | ns    | 0.028 | ns  | ns        | ns       | ns   | 0.005  | ns    |
| 7         | ns                         | ns    | ns    | ns    | ns    | ns    | /  | ns    | ns    | ns    | ns    | ns    | ns    | ns  | ns        | ns       | ns   | ns     | ns    |
| 8         | 0.005                      | 0.007 | ns    | 0.007 | 0.005 | 0.005 | ns | /     | ns    | 0.028 | 0.009 | 0.007 | 0.005 | ns  | ns        | ns       | ns   | ns     | 0.012 |
| 9         | ns                         | ns    | ns    | ns    | ns    | ns    | ns | ns    | /     | ns    | ns    | ns    | ns    | ns  | ns        | ns       | ns   | ns     | 0.022 |
| 10        | ns                         | ns    | ns    | ns    | ns    | ns    | ns | 0.028 | ns    | /     | ns    | ns    | ns    | ns  | ns        | ns       | ns   | ns     | ns    |
| 11        | 0.005                      | 0.012 | ns    | 0.005 | 0.005 | 0.005 | ns | 0.009 | ns    | ns    | /     | 0.007 | ns    | ns  | ns        | ns       | ns   | 0.005  | 0.028 |
| 12        | ns                         | ns    | 0.037 | ns    | ns    | ns    | ns | 0.007 | ns    | ns    | 0.007 | /     | ns    | ns  | ns        | ns       | ns   | 0.005  | ns    |
| 13        | ns                         | ns    | ns    | 0.028 | ns    | 0.028 | ns | 0.005 | ns    | ns    | ns    | ns    | /     | ns  | ns        | ns       | ns   | 0.005  | 0.047 |
| BHT       | ns                         | ns    | ns    | ns    | ns    | ns    | ns | ns    | ns    | ns    | ns    | ns    | ns    | /   | ns        | ns       | ns   | ns     | ns    |
| Celecoxib | ns                         | ns    | ns    | ns    | ns    | ns    | ns | ns    | ns    | ns    | ns    | ns    | ns    | ns  | /         | ns       | ns   | ns     | ns    |
| Zileuton  | ns                         | ns    | ns    | ns    | ns    | ns    | ns | ns    | ns    | ns    | ns    | ns    | ns    | ns  | ns        | /        | ns   | ns     | ns    |
| Urea      | ns                         | ns    | ns    | ns    | ns    | ns    | ns | ns    | ns    | ns    | ns    | ns    | ns    | ns  | ns        | ns       | /    | ns     | ns    |
| Trolox    | 0.005                      | 0.005 | 0.005 | 0.005 | 0.005 | 0.005 | ns | ns    | ns    | ns    | 0.005 | 0.005 | 0.005 | ns  | ns        | ns       | ns   | /      | 0.000 |
| TBH       | ns                         | ns    | 0.037 | ns    | ns    | ns    | ns | 0.012 | 0.022 | ns    | 0.028 | ns    | 0.047 | ns  | ns        | ns       | ns   | 0.000  | /     |
